# Supplementary material for: Characterising hospitals’ suitability for medical officer internship training in Kenya: analysis of the Kenya Harmonized Health Facility Assessment
Source: Research Square preprint supplement (doi:10.21203/rs.3.rs-762857/v1), 2021-07-30
Supplement: Supplementary file 1 [file 5abb7ab98b46e20cd59d3328.docx]

# Additional file 3. Comparing internship hospitals sampled in KHHFA and others

|  | 61 KHHFA hospitals | 12 other hospitals |
| --- | --- | --- |
| Level |  |  |
| - Level 4 | 44 | 11 |
| - Level 5 | 15 | 1 |
| - Level 6 | 2 | 0 |
| Ownership |  |  |
| - MoH | 54 | 0 |
| - Private | 2 | 4 |
| - FBO | 5 | 8 |
| Bed number |  |  |
| - Mean (SD) | 262.9 (213.4) | 171.2 (71.0) |
| - Median (IQR) | 200 (156, 276) | 180 (106, 221) |
| Total delivery |  |  |
| - Mean | 4585.1 (2747.0) | 1349.4 (945.7) |
| - Median (IQR) | 3980.7 (2972.3, 5502.7) | 1150.4 (649.7, 1683.5) |
| Live births |  |  |
| - Mean | 4466.9 (2691.9) | 1321.3 (927.8) |
| - Median (IQR) | 3814.3 (2844, 5384.3) | 1138.4 (626.5, 1630) |
| C-section |  |  |
| - Mean | 1190.3 (917.6) | 536.1 (270.7) |
| - Median (IQR) | 987.3 (734.3, 1319.3) | 536.6 (289, 708.5) |
