# Supplementary material for: Characterising hospitals’ suitability for medical officer internship training in Kenya: analysis of the Kenya Harmonized Health Facility Assessment
Source: Research Square preprint supplement (doi:10.21203/rs.3.rs-762857/v1), 2021-07-30
Supplement: Supplementary file 1 [file c400cd579e1a80bc74cbee1a.docx]

## Table 2. Capacity and readiness scores by hospital characteristics

| **Level 4 small hospitals (n=23)** | **Level 4 large hospitals (n=23)** | **Level 5 & 6 hospitals (n=15)** | **Total (n=61)** |
| --- | --- | --- | --- |
| Total capacity & readiness index | 63% | 67% | 81% | 69% |
| Human resources for health | 64% | 67% | 89% | 71% |
| Lab test | 60% | 63% | 77% | 65% |
| Oxygen & respiratory support | 64% | 57% | 77% | 64% |
| General equipment | 53% | 59% | 72% | 60% |
| 24/7 | 58% | 65% | 68% | 63% |
| Quality and safety | 35% | 38% | 50% | 40% |
| Infection prevention & control | 57% | 58% | 92% | 66% |
| Surgery | 94% | 89% | 97% | 93% |
| Internal medicine | 70% | 73% | 90% | 76% |
| Paediatrics | 67% | 70% | 81% | 72% |
| OBGYN | 89% | 91% | 91% | 90% |
| Mental health/Neurology | 44% | 73% | 83% | 64% |
