# Supplementary material for: Characterising hospitals’ suitability for medical officer internship training in Kenya: analysis of the Kenya Harmonized Health Facility Assessment
Source: Research Square preprint supplement (doi:10.21203/rs.3.rs-762857/v1), 2021-07-30
Supplement: Supplementary file 2 [file 76a686d547d9b84e73626362.docx]

## Additional file 1. 166 Indicators included for each general domain and speciality domain

| **Domain** | **Indicator** | **1 – considered available** | **0 – considered unavailable** |
| --- | --- | --- | --- |
| **Human resources for health (6)** | At least five medical specialists | - 5 or more specialists | - Less than 5 specialists |
| At least one surgeon | - 1 or more | - Less than 1 |
| At least one internist | - 1 or more | - Less than 1 |
| At least one paediatrician | - 1 or more | - Less than 1 |
| At least one obstetrician-gynaecologist | - 1 or more | - Less than 1 |
| At least one anaesthesiologist | - 1 or more | - Less than 1 |
| **Lab test (31)** | HIV rapid test | - Observed, at least one not expired | - Not observed, reported available but not seen - Not observed, never available |
| Syphilis rapid test | - Observed, at least one not expired | - Not observed, reported available but not seen - Not observed, never available |
| Urine rapid test for pregnancy | - Observed, at least one not expired | - Not observed, reported available but not seen - Not observed, never available |
| Urine dipstick 3 | - Observed, at least one not expired | - Not observed, reported available but not seen - Not observed, never available |
| Haemoglobin A1c rapid test | - Observed, at least one not expired | - Not observed, reported available but not seen - Not observed, never available |
| Colorimeter or haemoglobinometer | - Observed, functional/valid | - Reported (not seen), functional/valid - Not available today |
| Glucometer | - Observed, functional/valid | - Reported (not seen), functional/valid - Not available today |
| Glucometer test strips/discs | - Observed, functional/valid | - Reported (not seen), functional/valid - Not available today |
| Any blood chemistry test | - Yes, onsite | - No, never available |
| Renal function test | - Yes, observed, functional/valid | - No, not available today |
| Other tests for bilirubin | - Yes, onsite | - Yes, offsite (specimen sent) - No, never available |
| ABO blood grouping testing | - Yes, onsite | - Yes, offsite (specimen sent) - No, never available |
| Rhesus blood grouping testing | - Yes, onsite | - Yes, offsite (specimen sent) - No, never available |
| Cross-match testing | - Yes, onsite | - Yes, offsite (specimen sent) - No, not available today |
| Onsite PCR for HIV viral load or HIV early-infant diagnosis | - Yes, onsite | - Yes, offsite (specimen sent) - Yes, not fucntional/not valid - No, not available today |
| Xpert MTB/RIF rapid diagnostic testing for TB | - Yes, onsite | - Yes, offsite (specimen sent) - No, not available today |
| Urine microscopy | - Yes, observed, functional/valid | - No, not available today |
| Malaria smears | - Yes, observed, functional/valid | - No, not available today |
| Microscopy test CSF body fluid counts | - Yes, onsite | - Yes, offsite (specimen sent) - No, never available |
| Cryptococcal antigen testing | - Yes, onsite | - Yes, offsite (specimen sent) - No, never available |
| Gram stain testing | - Yes, onsite | - Yes, offsite (specimen sent) - No, never available |
| Culture and sensitivity test | - Yes, onsite | - Yes, offsite (specimen sent) - No, never available |
| Blood cultures test | - Yes, onsite | - Yes, offsite (specimen sent) - No, never available |
| Fine needle aspiration cytology | - Perform in facility | - Refer for test - Not used |
| Core needle biopsy of lump specimen | - Perform in facility | - Refer for test - Not used |
| Prostate Specific Antigen (PSA) Testing | - Perform in facility | - Refer for test - Not used |
| Blood gas measurement | - Yes, onsite | - Yes, offsite (specimen sent) - No, never available |
| Cardiac marker (CK, Troponin) test | - Yes, onsite | - Yes, offsite (specimen sent) - No, never available |
| PAP smear read in facility | - Yes, read in facility | - Yes, read outside facility - No - 0 PAP smears were conducted with results recorded during the past 12 completed months |
| VIA/VILLI read in facility | - Yes, read in facility | - Yes, read outside facility - No - 0 VIA/VILLI were conducted with results recorded during the past 12 completed months |
| Prepare and examine tissues or samples for cancer | - Yes | - No |
| **Oxygen and respiratory support (10)** | Surgery oxygen equipment functioning - Oxygen tank/cylinder with attached pressure gauge, pressure regulator | - Yes | - No - Don’t know |
| Maternity paediatric-sized oxygen delivery apparatus functioning | - Yes | - No |
| Outpatient pulse oximeter functioning | - Yes | - No |
| Maternity pulse oximeter functioning | - Yes | - No |
| Paediatrics/neonatal oxygen functioning | - Yes | - No |
| Emergency pulse oximeter functioning | - Yes | - No |
| Ventilator available | - Yes, available now | - No |
| Chest tubes available | - Observed, at least one not expired | - Not observed, not available today - Not observed, never available |
| Adult CPAP equipment available | - Observed, at least one not expired | - Observed, available but expired - Not observed, reported available but not seen - Not observed, not available today - Not observed, never available |
| Emergency paediatrics and neonatal CPAP available | - Observed | - Reported, not seen - Not available |
| **General equipment (8)** | ECG offered | - Yes | - No |
| ECG equipment functioning | - Yes equipment available and functioning | - No equipment not available or not functioning |
| Ultrasound offered | - Yes | - No |
| Ultrasound equipment functioning | - Yes equipment available and functioning | - No equipment not available or not functioning |
| X-ray offered | - Yes | - No |
| X-ray equipment functioning | - Yes equipment available and functioning | - No equipment not available or not functioning |
| CT scan offered | - Yes | - No |
| CT scan equipment functioning | - Yes equipment available and functioning | - No equipment not available or not functioning |
| **24 7 (8)** | Emergency service with structured triage tool 24/7 | - 24-hour emergency service | - 10 hours - No structured triage tool |
| Medical officer onsite or oncall in facility 24/7 | - MO or Emergency practitioner always available, onsite - MO or Emergency practitioner always available, not onsite but oncall in facility | - MO or Emergency practitioner always available, not in facility - Staff not available 24 hours |
| Formal triage tool used 24/7 | - Yes | - No |
| Emergency surgery and anaesthesia 24/7 | - 24-hour emergency service | - 0, 2 or 8 hours |
| Emergency radiology 24/7 | - 24-hour emergency service | - 0, 5, 9, 10, 12 hours |
| Emergency diagnostics 24/7 | - 24-hour emergency service | - 0, 7, 10, 12 hours |
| Emergency pharmacy 24/7 | - 24-hour emergency service | - 8, 9, 10, 12, 15 hours - No dedicated pharmacy in facility |
| Blood transfusion | - Yes available now | - No |
| **IPC (9)** | Facility has IPC guideline | - Yes, observed | - Reported not seen - No |
| Technical IPC committee | - Yes | - No |
| Dedicated (full-time) IPC staff | - Yes | - No |
| Guidelines for cleaning | - Yes, observed | - Reported not seen - No |
| Step-by-step techniques for specific tasks | - Yes | - No |
| Cleaning roster or schedule specifying responsibility | - Yes | - No |
| Cleaning beds observed | - Yes | - No |
| Cleaning counters/tables observed | - Yes | - No |
| Cleaning toilets observed | - Yes | - No |
| **Quality and safety (24)** | Monthly quality assurance committee meeting | - Monthly | - Quarterly - Biannually |
| Documentation of quality assurance information reviewed | - Yes, documentation observed | - Yes, documentation reported not seen |
| Ongoing quality improvement using Plan-Do-Check-Study-Act approach | - Yes, service-specific - Yes, across facility | - No |
| Multi-disciplinary quality improvement team | - Yes | - No |
| Departmental specific work improvement teams | - Yes | - No |
| Documentation of improvement achieved as a result of quality improvement process | - Yes, documentation observed | - Yes, documentation reported not seen - No |
| Kenya Quality Model for Health completed in 2017 or 2018 | - 2017 - 2018 | - 2014 - 2016 - Don’t know |
| Formal case reviews carried out at least monthly | - At least weekly - At least monthly | - At least quarterly - No specific timing |
| Death reviews results recorded | - Yes | - No |
| Guidelines of events that are considered adverse and required to be reported | - Yes, documentation observed | - Yes, documentation reported not seen - No |
| Notes or reports that show evidence of review and plan of action for the reports about adverse events | - Yes, documentation observed | - Yes, documentation reported not seen - No |
| Written guidelines that define nosocomial infections and the process for reporting | - Yes, observed | - Reported not seen - No |
| Report or record shows nosocomial infections reported over the past 6 months | - Yes, observed | - Reported not seen - No |
| Written policies and procedures for identifying and managing drug-use problems | - Yes, observed | - Reported not seen - No |
| Surgery related mortality and morbidity review meetings at least monthly | - At least weekly - At least monthly | - At least quarterly - No specific timing - None conducted |
| Surgery related mortality and morbidity review meeting results recorded | - Yes, observed | - Reported not seen - No |
| Written guidelines or instructions for reporting on adverse events related to surgery | - Yes, observed | - Reported not seen - No - Don’t know |
| Notes or reports that show evidence of review and plan of action for the surgery reports | - Yes, documentation observed | - Yes, documentation reported not seen - No |
| Guidelines of postoperative infection definition | - Yes, documentation observed | - Yes, documentation reported not seen - No |
| Notes or reports that show evidence of review and plan of action for the reports about postoperative infection | - Yes, documentation observed | - Yes, documentation reported not seen - No |
| Indicator on deaths prior to discharge among patients who had a procedure in a surgical theater monitored | - Yes | - No |
| Indicator on deaths prior to discharge among < 15 year old patients who had a procedure in a surgical theater monitored | - Yes | - No |
| Indicator on post-operative surgical wound infection numbers monitored | - Yes | - No |
| Facility monitor unplanned and unexpected hospital readmissions for any conditions | - Yes | - No |
| **Surgery equipment and medication (8)** | Basic operating table functioning | - Yes | - No |
| Overhead operating light functioning | - Yes | - No |
| Cardiac monitor functioning | - Yes | - No - Don’t know |
| EKG electrodes functioning | - Yes | - No - Don’t know |
| Thermometer functioning | - Yes | - No - Don’t know |
| Blood pressure apparatus functioning | - Yes | - No |
| Suction apparatus functioning | - Yes | - No |
| Anaesthesia machine available | - Yes available now | - No |
| **Surgery service (12)** | Wound debridement service available | - Yes, outpatient - Yes, inpatient - Yes both out and inpatient | - No |
| Acute burn management service available | - Yes, outpatient - Yes, inpatient - Yes both out and inpatient | - No |
| Closed repair of fracture service available | - Yes, outpatient - Yes, inpatient - Yes both out and inpatient | - No |
| Closed reduction of dislocated joint service available | - Yes, outpatient - Yes, inpatient - Yes both out and inpatient | - No |
| Cricothyroidotomy service available | - Yes, outpatient - Yes, inpatient - Yes both out and inpatient | - No |
| Male circumcision service available | - Yes, outpatient - Yes, inpatient - Yes both out and inpatient | - No |
| Hydrocele reduction service available | - Yes, outpatient - Yes, inpatient - Yes both out and inpatient | - No |
| Biopsy of lymph node or mass service available | - Yes, outpatient - Yes, inpatient - Yes both out and inpatient | - No |
| Appendectomy service available | - Yes, outpatient - Yes, inpatient - Yes both out and inpatient | - No |
| Hernia repair service available | - Yes, outpatient - Yes, inpatient - Yes both out and inpatient | - No |
| Open reduction and fixation service available | - Yes, outpatient - Yes, inpatient - Yes both out and inpatient | - No |
| Any procedures using laparotomy service available | - Yes, outpatient - Yes, inpatient - Yes both out and inpatient | - No |
| **Internal medicine equipment and medication (3)** | Defibrillator available | - Yes, available now | - No |
| Renal dialysis/haemodialysis machine available | - Yes, available now | - Yes, not available now - No |
| Lumbar puncture kit available | - Observed, at least one not expired | - Observed, available but expired - Not observed, reported available but not seen - Not observed, not available today - Not observed, never available |
| **Internal medicine service (10)** | ART prescription and follow-up for U5 children service available | - Yes, ART prescription and clinical follow-up | - Yes, ART prescription, no clinical follow-up - Yes, clinical follow-up, no ART prescription |
| HIV/AIDS care and support service available | - Yes | - No |
| Diagnose and/or manage diabetes available | - Yes | - No |
| Diagnose and/or manage acute myocardial infraction available | - Diagnose, treat and patient follow-up | - Patient follow-up only - No service/refer suspect case |
| Diagnose and/or manage chronic respiratory disease available | - Yes | - No |
| Diagnose and/or manage chronic kidney disease available | - Yes | - No |
| Screening, diagnosis and/or treatment services for breast cancer available | - Yes | - No |
| Screening, diagnosis and/or treatment services for colorectal cancer available | - Yes | - No |
| Screening, diagnosis and/or treatment services for prostate cancer available | - Yes | - No |
| Palliative care service available | - Yes | - No |
| **Paediatrics equipment and medication (8)** | Phototherapy machine available | - Yes, available now | - No |
| Infant incubator available at outpatient | - Yes, available now | - Yes, not available now - No |
| Bed or location for KMC caregiver overnight | - Yes, observed | - Reported, not seen - No |
| Exchange transfusion blood available today | - Yes | - No |
| Incubator available today | - Yes | - No |
| Radiant warmer available today | - Yes | - No |
| Artificial ventilation available today | - Yes | - No |
| Device for intraosseous access available | - Observed, at least one not expired | - Observed, available but expired - Not observed, reported available but not seen - Not observed, not available today - Not observed, never available |
| **Paediatrics service (3)** | KMC for premature or LBW used | - Yes | - No |
| Newborn sepsis service available | - Yes | - No |
| Newborn sepsis full antibiotics regimen and follow-up always available | - Yes always | - Yes sometimes - Never |
| **OBGYN equipment and medication (10)** | Blood pressure apparatus functioning | - Yes | - No |
| Infant scale (with 100 gram gradation) functioning | - Yes | - Don’t know |
| Resuscitation table (with heat source) functioning | - Yes | - No |
| Self-inflating bag and mask for resuscitation functioning | - Yes | - No |
| Newborn bag and mask size 0 for resuscitation of pre-term babies functioning | - Yes | - No |
| Newborn bag and mask size 1 for resuscitation of term babies functioning | - Yes | - No |
| Magnesium sulphate injection available | - Observed, at least one not expired | - Not observed, not available today |
| Dexamethasone injection available | - Observed, at least one not expired | - Not observed, not available today - Not observed, never available |
| Misoprostol tablet 200 mcg available | - Observed, at least one not expired | - Not observed, not available today - Not observed, never available |
| Oxytocin injection available | - Observed, at least one not expired | - Not observed, not available today - Not observed, never available |
| **OBGYN service (10)** | Active management of third stage labour (AMTSL) service available | - Yes | - No |
| Monitoring and management of labor using a partograph service available | - Yes | - No |
| Hygienic cord care service available | - Yes | - No |
| Parenteral administration of antibiotics carried out | - Yes | - No |
| Parenteral administration of oxytocic for treatment of postpartum haemorrhage carried out | - Yes | - No |
| Assisted vaginal delivery using manual vacuum extraction (MVE) or forceps carried out | - Yes | - No, service not offered - No, trained staff but no cases |
| Manual removal of placenta carried out | - Yes | - No |
| Removal of retained products of conception using D&C or manual vacuum aspiration carried out | - Yes | - No, service not offered |
| PMTCT available | - Yes | - No |
| Treatment of pre-invasive cervical cancer available | - Yes | - No |
| **Mental health / neurology (6)** | Any mental/neurological services offered | - Yes, inpatient only | - Not offered |
| Mental health inpatient ward available | - Yes, inpatient only | - Not offered |
| Neurological health inpatient ward available | - Yes, inpatient only | - Not offered |
| Depression diagnosis and follow-up available | - Diagnoses and provides patient follow-up | - Diagnoses only - Provides patient follow-up only - No |
| Psychosis diagnosis and follow-up available | - Diagnoses and provides patient follow-up | - Diagnoses only - Provides patient follow-up only - No |
| Epilepsy diagnosis and follow-up available | - Diagnoses and provides patient follow-up | - Diagnoses only - Provides patient follow-up only - No |
