# Supplementary material for: Characterising hospitals’ suitability for medical officer internship training in Kenya: analysis of the Kenya Harmonized Health Facility Assessment
Source: Research Square preprint supplement (doi:10.21203/rs.3.rs-762857/v1), 2021-07-30
Supplement: Supplementary file 3 [file d340a161654d61cb9c49c506.docx]

# Additional file 2. All indicator heatmap by hospital bed number

|  | **Level 4 small hospitals (n=23)** | **Level 4 large hospitals (n=23)** | **Level 5 & 6 hospitals (n=15)** | **Total (n=61)** |
| --- | --- | --- | --- | --- |
| **Human resources for health** |  |  |  |  |
| At least five medical specialists | 39% | 44% | 67% | 48% |
| At least one surgeon | 96% | 96% | 100% | 97% |
| At least one internist | 48% | 57% | 73% | 57% |
| At least one paediatrician | 70% | 91% | 100% | 85% |
| At least one obstetrician-gynaecologist | 87% | 91% | 100% | 92% |
| At least one anaesthesiologist | 44% | 26% | 93% | 49% |
| **Lab tests** |  |  |  |  |
| *Rapid test* |  |  |  |  |
| HIV rapid test | 87% | 91% | 87% | 89% |
| Syphilis rapid test | 96% | 91% | 100% | 95% |
| Urine rapid test for pregnancy | 100% | 91% | 100% | 97% |
| Urine dipstick 3 | 35% | 44% | 53% | 43% |
| Haemoglobin A1c rapid test | 57% | 57% | 87% | 64% |
| Colorimeter or haemoglobinometer | 70% | 61% | 67% | 66% |
| Glucometer | 96% | 96% | 93% | 95% |
| Glucometer test strips/discs | 96% | 100% | 93% | 97% |
| *Basic lab test* |  |  |  |  |
| Any blood chemistry test | 83% | 78% | 93% | 84% |
| Renal function test | 70% | 74% | 93% | 77% |
| Other tests for bilirubin | 65% | 70% | 67% | 67% |
| ABO blood grouping testing | 83% | 74% | 80% | 79% |
| Rhesus blood grouping testing | 83% | 74% | 87% | 80% |
| Cross-match testing | 57% | 70% | 80% | 67% |
| *Infectious disease test* |  |  |  |  |
| Onsite PCR for HIV viral load or HIV early-infant diagnosis | 0% | 4% | 27% | 8% |
| Xpert MTB/RIF rapid diagnostic testing for TB | 61% | 83% | 87% | 75% |
| Urine microscopy | 91% | 83% | 93% | 89% |
| Malaria smears | 91% | 83% | 93% | 89% |
| Microscopy test CSF body fluid counts | 83% | 78% | 93% | 84% |
| Cryptococcal antigen testing | 74% | 78% | 80% | 77% |
| Gram stain testing | 91% | 78% | 93% | 87% |
| Culture and sensitivity test | 57% | 74% | 87% | 71% |
| Blood cultures test | 17% | 22% | 80% | 34% |
| *Advanced lab test* |  |  |  |  |
| Fine needle aspiration cytology | 22% | 44% | 67% | 41% |
| Core needle biopsy of lump specimen | 35% | 44% | 67% | 46% |
| Prostate Specific Antigen (PSA) Testing | 48% | 61% | 80% | 61% |
| Blood gas measurement | 9% | 13% | 60% | 23% |
| Cardiac marker (CK, Troponin) test | 9% | 30% | 53% | 28% |
| PAP smear read in facility | 17% | 13% | 33% | 20% |
| VIA/VILLI read in facility | 96% | 78% | 73% | 84% |
| Prepare and examine tissues or samples for cancer | 0% | 4% | 53% | 15% |
| **Oxygen and respiratory support** |  |  |  |  |
| Surgery oxygen equipment functioning - Oxygen tank/cylinder with attached pressure gauge, pressure regulator | 87% | 83% | 73% | 82% |
| Maternity paediatric-sized oxygen delivery apparatus functioning | 87% | 74% | 93% | 84% |
| Outpatient pulse oximeter functioning | 39% | 48% | 60% | 48% |
| Maternity pulse oximeter functioning | 35% | 52% | 67% | 49% |
| Paediatrics/neonatal oxygen functioning | 100% | 100% | 100% | 100% |
| Emergency pulse oximeter functioning | 65% | 65% | 100% | 74% |
| Ventilator available | 52% | 52% | 87% | 61% |
| Chest tubes available | 30% | 61% | 80% | 54% |
| Adult CPAP equipment available | 13% | 30% | 40% | 26% |
| Emergency paediatrics and neonatal CPAP available | 17% | 26% | 20% | 21% |
| **Equipment** |  |  |  |  |
| ECG offered | 39% | 35% | 93% | 51% |
| ECG equipment functioning | 26% | 35% | 87% | 44% |
| Ultrasound offered | 83% | 91% | 100% | 90% |
| Ultrasound equipment functioning | 83% | 91% | 100% | 90% |
| X-ray offered | 87% | 87% | 100% | 90% |
| X-ray equipment functioning | 87% | 83% | 100% | 89% |
| CT scan offered | 26% | 22% | 80% | 38% |
| CT scan equipment functioning | 26% | 17% | 73% | 34% |
| **24 7 availability** |  |  |  |  |
| Emergency service 24/7 | 26% | 13% | 47% | 26% |
| Medical officer onsite or oncall in facility 24/7 | 78% | 70% | 93% | 79% |
| Formal triage tool used 24/7 | 26% | 17% | 47% | 28% |
| Emergency surgery and anaesthesia 24/7 | 17% | 13% | 40% | 21% |
| Emergency radiology 24/7 | 91% | 87% | 100% | 92% |
| Emergency diagnostics 24/7 | 96% | 87% | 93% | 92% |
| Emergency pharmacy 24/7 | 87% | 83% | 93% | 87% |
| Blood transfusion | 91% | 83% | 100% | 90% |
| **Infection prevention and control** |  |  |  |  |
| Facility has IPC guideline | 87% | 70% | 87% | 80% |
| Technical IPC committee | 96% | 100% | 93% | 97% |
| Dedicated (full-time) IPC staff | 57% | 52% | 73% | 59% |
| Guidelines for cleaning | 48% | 57% | 33% | 48% |
| Step-by-step techniques for specific tasks | 44% | 57% | 60% | 53% |
| Cleaning roster or schedule specifying responsibility | 48% | 61% | 73% | 59% |
| Cleaning beds observed | 44% | 61% | 67% | 56% |
| Cleaning counters/tables observed | 48% | 61% | 60% | 56% |
| Cleaning toilets observed | 48% | 70% | 67% | 61% |
| **Quality and safety** |  |  |  |  |
| Monthly quality assurance committee meeting | 26% | 35% | 53% | 36% |
| Documentation of quality assurance information reviewed | 52% | 44% | 67% | 53% |
| Ongoing quality improvement using Plan-Do-Check-Study-Act approach | 64% | 67% | 67% | 66% |
| Multi-disciplinary quality improvement team | 65% | 61% | 80% | 67% |
| Departmental specific work improvement teams | 65% | 61% | 80% | 67% |
| Documentation of improvement achieved as a result of quality improvement process | 48% | 52% | 33% | 46% |
| Kenya Quality Model for Health completed in 2017 or 2018 | 48% | 44% | 60% | 49% |
| Formal case reviews carried out at least monthly | 57% | 57% | 67% | 59% |
| Death reviews results recorded | 91% | 91% | 100% | 93% |
| Guidelines of events that are considered adverse and required to be reported | 22% | 35% | 33% | 30% |
| Notes or reports that show evidence of review and plan of action for the reports about adverse events | 22% | 39% | 27% | 30% |
| Written guidelines that define nosocomial infections and the process for reporting | 9% | 9% | 40% | 16% |
| Report or record shows nosocomial infections reported over the past 6 months | 9% | 4% | 33% | 13% |
| Written policies and procedures for identifying and managing drug-use problems | 70% | 65% | 67% | 67% |
| Surgery related mortality and morbidity review meetings at least monthly | 44% | 39% | 60% | 46% |
| Surgery related mortality and morbidity review meeting results recorded | 44% | 57% | 53% | 51% |
| Written guidelines or instructions for reporting on adverse events related to surgery | 9% | 26% | 33% | 21% |
| Notes or reports that show evidence of review and plan of action for the surgery reports | 9% | 17% | 27% | 16% |
| Guidelines of postoperative infection definition | 17% | 26% | 33% | 25% |
| Notes or reports that show evidence of review and plan of action for the reports about postoperative infection | 13% | 17% | 13% | 15% |
| Indicator on deaths prior to discharge among patients who had a procedure in a surgical theater monitored | 9% | 22% | 53% | 25% |
| Indicator on deaths prior to discharge among < 15 year old patients who had a procedure in a surgical theater monitored | 9% | 17% | 47% | 21% |
| Indicator on post-operative surgical wound infection numbers monitored | 9% | 17% | 40% | 20% |
| Facility monitor unplanned and unexpected hospital readmissions for any conditions | 30% | 26% | 40% | 31% |
| **Surgery** |  |  |  |  |
| ***Surgery equipment & medication*** |  |  |  |  |
| Basic operating table functioning | 96% | 96% | 100% | 97% |
| Overhead operating light functioning | 96% | 96% | 100% | 97% |
| Cardiac monitor functioning | 87% | 83% | 100% | 89% |
| EKG electrodes functioning | 83% | 70% | 100% | 82% |
| Thermometer functioning | 96% | 87% | 93% | 92% |
| Blood pressure apparatus functioning | 70% | 91% | 93% | 84% |
| Suction apparatus functioning | 100% | 96% | 100% | 98% |
| Anaesthesia machine available | 83% | 74% | 93% | 82% |
| ***Surgery service*** |  |  |  |  |
| Wound debridement service available | 100% | 100% | 100% | 100% |
| Acute burn management service available | 96% | 96% | 100% | 97% |
| Closed repair of fracture service available | 96% | 91% | 100% | 95% |
| Closed reduction of dislocated joint service available | 96% | 91% | 100% | 95% |
| Cricothyroidotomy service available | 78% | 57% | 80% | 71% |
| Male circumcision service available | 100% | 96% | 93% | 97% |
| Hydrocele reduction service available | 100% | 91% | 93% | 95% |
| Biopsy of lymph node or mass service available | 100% | 100% | 100% | 100% |
| Appendectomy service available | 100% | 96% | 100% | 98% |
| Hernia repair service available | 100% | 96% | 100% | 98% |
| Open reduction and fixation service available | 100% | 83% | 100% | 93% |
| Any procedures using laparotomy service available | 100% | 96% | 100% | 98% |
| **Internal medicine** |  |  |  |  |
| ***Internal medicine equipment & medication*** |  |  |  |  |
| Defibrillator available | 57% | 39% | 73% | 54% |
| Renal dialysis/haemodialysis machine available | 44% | 65% | 93% | 64% |
| Lumbar puncture kit available | 22% | 26% | 80% | 38% |
| ***Internal medicine service*** |  |  |  |  |
| ART prescription and follow-up for U5 children service available | 96% | 96% | 93% | 95% |
| HIV/AIDS care and support service available | 100% | 96% | 100% | 98% |
| Diagnose and/or manage diabetes available | 100% | 100% | 100% | 100% |
| Diagnose and/or manage acute myocardial infraction available | 83% | 74% | 93% | 82% |
| Diagnose and/or manage chronic respiratory disease available | 100% | 100% | 100% | 100% |
| Diagnose and/or manage chronic kidney disease available | 83% | 91% | 100% | 90% |
| Screening, diagnosis and/or treatment services for breast cancer available | 78% | 87% | 93% | 85% |
| Screening, diagnosis and/or treatment services for colorectal cancer available | 35% | 30% | 60% | 39% |
| Screening, diagnosis and/or treatment services for prostate cancer available | 61% | 83% | 87% | 75% |
| Palliative care service available | 48% | 65% | 100% | 67% |
| **Paediatrics** |  |  |  |  |
| ***Paediatrics equipment & medication*** |  |  |  |  |
| Phototherapy machine available | 52% | 52% | 67% | 56% |
| Infant incubator available | 74% | 78% | 87% | 79% |
| Bed or location for KMC caregiver overnight | 61% | 70% | 80% | 69% |
| Exchange transfusion blood available today | 26% | 17% | 60% | 31% |
| Incubator available today | 96% | 100% | 100% | 98% |
| Radiant warmer available today | 91% | 96% | 93% | 93% |
| Artificial ventilation available today | 48% | 57% | 73% | 57% |
| Device for intraosseous access available | 17% | 30% | 53% | 31% |
| ***Paediatrics service*** |  |  |  |  |
| KMC for premature or LBW used | 83% | 87% | 93% | 87% |
| Newborn sepsis service available | 100% | 96% | 100% | 98% |
| Newborn sepsis full antibiotics regimen and follow-up always available | 91% | 87% | 87% | 89% |
| **OBGYN** |  |  |  |  |
| ***OBGYN equipment & medication*** |  |  |  |  |
| Blood pressure apparatus functioning | 91% | 100% | 100% | 97% |
| Infant scale (with 100 gram gradation) functioning | 87% | 96% | 100% | 93% |
| Resuscitation table (with heat source) functioning | 91% | 100% | 93% | 95% |
| Self-inflating bag and mask for resuscitation functioning | 87% | 91% | 80% | 87% |
| Newborn bag and mask size 0 for resuscitation of pre-term babies functioning | 91% | 91% | 87% | 90% |
| Newborn bag and mask size 1 for resuscitation of term babies functioning | 96% | 96% | 93% | 95% |
| Magnesium sulphate injection available | 96% | 96% | 100% | 97% |
| Dexamethasone injection available | 91% | 91% | 73% | 87% |
| Misoprostol tablet 200 mcg available | 74% | 70% | 73% | 72% |
| Oxytocin injection available | 100% | 96% | 100% | 98% |
| ***OBGYN service*** |  |  |  |  |
| Active management of third stage labour (AMTSL) service available | 100% | 100% | 100% | 100% |
| Monitoring and management of labor using a partograph service available | 96% | 96% | 100% | 97% |
| Hygienic cord care service available | 100% | 91% | 93% | 95% |
| Parenteral administration of antibiotics carried out | 100% | 100% | 100% | 100% |
| Parenteral administration of oxytocic for treatment of postpartum haemorrhage carried out | 100% | 100% | 100% | 100% |
| Assisted vaginal delivery using manual vacuum extraction (MVE) or forceps carried out | 57% | 74% | 73% | 67% |
| Manual removal of placenta carried out | 100% | 100% | 100% | 100% |
| Removal of retained products of conception using D&C or manual vacuum aspiration carried out | 83% | 83% | 100% | 87% |
| PMTCT available | 100% | 100% | 100% | 100% |
| Treatment of pre-invasive cervical cancer available | 44% | 48% | 53% | 48% |
| **Mental health / neurology** |  |  |  |  |
| Any mental/neurological services offered | 65% | 96% | 93% | 84% |
| Mental health inpatient ward available | 26% | 48% | 80% | 48% |
| Neurological health inpatient ward available | 13% | 22% | 67% | 30% |
| Depression diagnosis and follow-up available | 48% | 87% | 87% | 72% |
| Psychosis diagnosis and follow-up available | 52% | 91% | 87% | 75% |
| Epilepsy diagnosis and follow-up available | 57% | 91% | 87% | 77% |
